**Die Lungenfunktion. Physiologie und Pathophysiologie, Methodik [Lung function. Physiology and patho-physiology, methods.]** By WOLFGANG T. ULMER, GERHARD REICHEL, and DIETRICH NOLTE. Stuttgart, Georg Thieme Verlag, 1970. Pp. 219. Illustrations 112, tables 21. DM 38 (cloth bound).

The evaluation of lung function has become a clinical tool which often decisively influences the indications for medical or surgical treatment. This volume deals with the foundations of modern lung-function tests. In three divisions of about equal length, physiology, pathophysiology, and methods are presented in a concise manner. In conscious simplification the authors try to work out the pathophysiologic bases of clinical treatment, the goal being to aid the practicing physician. They succeed admirably. The clear style and a multitude of illustrations aid in understanding. The monograph's usefulness is further enhanced by the index and an appendix of physiologic tables; the more than 500 references will help the interested reader to find more information. The detailed description of the commonly employed methods, including instrumentation, constitutes another important asset.

BRUNO J. URBAN, M.D.  
Department of Anesthesiology  
Downstate Medical Center  
State University of New York  
Brooklyn, New York 11203

**Airway Dynamics. Physiology and Pharmacology.** EDITED BY AREND BOCHUYS. Springfield, Illinois, Charles C Thomas, 1970. Pp. 345. \$29.50.

"Airway Dynamics," the published papers of a meeting held at Haverford College, Haverford, Pennsylvania, is the best all-inclusive current work on airway dynamics. Both physiologic and pharmacologic considerations are presented, and every aspect of airway dynamics has been approached through the investigative work and concepts of American, European, and Japanese groups. The major parts of the book include: physics (I), physiology (II), pharmacology (III), and aerosol clearance (IV). Every chapter is presented by experienced and acknowledged workers in the particular areas. Some repetition occurs, but this is minimal and not disturbing. New concepts are introduced, and especially noteworthy is the chapter by Varenne and Jacquemin, offering a new method for computation of airway resistance. Their approach is based upon an improved method for determination of airway resistance during exercise and voluntary hyperventilation. Information utilizing modern techniques to study functional properties of smooth muscle of airways and their responses to stimuli is presented. Descriptions of the effects of exogenous and endogenous bronchoactive agents, such as histamine, serotonin, and bradykinin are clearly delineated.

"Airway Dynamics" is mandatory reading for the investigator of the mechanics of respiration; it is a useful text for broadening the concepts and defining the mechanism of airway dynamics for students and physicians interested in the subject. Anesthesiologists, respiratory physiologists, pharmacologists, and biomedical engineers will profit from its contents. It is highly recommended as a worthwhile contribution to the physiologic and pharmacologic literature.

HAROLD A. LYONS, M.D.  
Professor of Medicine  
State University of New York  
Downstate Medical Center  
Brooklyn, New York 11203

**Origins of Psychopharmacology from CPZ to LSD.** BY ANNE E. CALDWELL. Springfield, Illinois, Charles C Thomas, 1970. Pp. 225. \$12.00.

This book is an attempt to chronicle the development of chlorpromazine (Cpz) as an anti-psychotic drug. It also briefly describes the chemical agents used to influence behavior in antiquity and during the late nineteenth century.

In the development of Cpz, the main focus is on the ideas and experience of the French surgeon, Laborit, who first suggested the use Cpz in psychiatry, based on his observation of its effects in surgical stress, and the previous use by investigators of other phenothiazines in the treatment of psychotic patients. We are not, however, given any information about the personal experience and feelings of Laborit or other early pioneers in the use of Cpz in this endeavor. The role of the search for improvements in pre- and postoperative medications in the development of Cpz, as well as its alleged use in diminishing the amounts of general anesthetic agents necessary for surgery, should be of particular interest to anesthesiologists.

A brief six-year chronologic report of the introduction of Cpz into psychiatric treatment in various countries of the world is presented. Very limited mention of the recent history of other drugs of interest to contemporary psychopharmacologists, such as reserpine and LSD (but only in relationship to Cpz), is provided. Separate chapters are devoted to the contemporary use of Cpz in psychiatry and how drugs are evaluated for clinical use in psychiatry. The role of chance vs. intuition and insight in the recognition of new drugs is briefly discussed. The book concludes with nearly 60 pages of notes, which the author intends to be an autonomous presentation of background information on Cpz and various other psychoactive drugs.

There is little doubt of the historical importance of the subject matter of this book, and the interesting story that could be made of it. However, there is so much that is objectionable in style and organization, as well as so much misstatement, apparently due to lack of direct experience by the
